# Supplementary material
Source: PubMed Central journal article supplement (PMC6714696)
Supplement: Supplementary_material.pdf [file Supplementary_material.pdf]

## Supplementary Material

### Supplementary Table A. Search Strategy Showing Terms Used and Number of Publications Identified

Searches were performed on 11 November 2015, with the following filters: publication date from 1990/01/01 to 2015/12/31, Humans, English language).

| Search                                             | Query                                                                                                                                                                                                                                                                                                                                                                                                                                                                                                                                                                                                                                                                                                                                                                                                                                                                                                                                                                    | Items found, N |
|----------------------------------------------------|--------------------------------------------------------------------------------------------------------------------------------------------------------------------------------------------------------------------------------------------------------------------------------------------------------------------------------------------------------------------------------------------------------------------------------------------------------------------------------------------------------------------------------------------------------------------------------------------------------------------------------------------------------------------------------------------------------------------------------------------------------------------------------------------------------------------------------------------------------------------------------------------------------------------------------------------------------------------------|----------------|
| PubMed:<br>major/minor<br>surgery in<br>hemophilia | ((("haemophilia" <sup>All Fields</sup> OR "haemophilia a" <sup>MeSH Terms</sup> OR "haemophilia a" <sup>All Fields</sup> OR "haemophilia" <sup>All Fields</sup> ) AND ("surgery" <sup>Subheading</sup> OR "surgery" <sup>All Fields</sup> OR "surgeries" <sup>All Fields</sup> OR "surgical procedures, operative" <sup>MeSH Terms</sup> OR "procedure" <sup>All fields</sup> OR ("surgical" <sup>All Fields</sup> AND "procedures" <sup>All Fields</sup> AND "operative" <sup>All Fields</sup> ) OR "operative surgical procedures" <sup>All Fields</sup> OR "general surgery" <sup>MeSH Terms</sup> OR ("general" <sup>All Fields</sup> AND "surgery" <sup>All Fields</sup> ) OR "general surgery" <sup>All Fields</sup> ) AND (major <sup>All Fields</sup> OR ("minor" <sup>All Fields</sup> OR "minor" <sup>All Fields</sup> )) AND (("1990/01/01" <sup>PDAT</sup> : "2015/12/31" <sup>PDAT</sup> ) AND "humans" <sup>MeSH Terms</sup> AND English <sup>lang</sup> ) | 363            |
| Embase:<br>major/minor<br>surgery in<br>hemophilia | (haemophilia and <sup>1990-2015/py</sup> ) and ((major and <sup>1990-2015/py</sup> ) or (minor and <sup>1990-2015/py</sup> )) and ((surgery and <sup>1990-2015/py</sup> ) or (surgical and <sup>1990-2015/py</sup> ) or (surgical and procedure and <sup>1990-2015/py</sup> ) or (operative and procedure and <sup>1990-2015/py</sup> ) or (operative and <sup>1990-2015/py</sup> ) or (operation and <sup>1990-2015/py</sup> ) or (procedure and <sup>1990-2015/py</sup> ) or (surgeries and <sup>1990-2015/py</sup> )) and humans/ <sup>lim</sup> and english/ <sup>lim</sup>                                                                                                                                                                                                                                                                                                                                                                                          | 758            |
